# Supplementary material for: Equilibria in Aqueous Cobalt(II)—Reduced Schiff Base N-(2-hydroxybenzyl)alanine System: Chemical Characterization, Kinetic Analysis, Antimicrobial and Cytotoxic Properties
Source: PubMed Central journal article supplement (PMC7436002; doi:10.3390/molecules25153462), 2020-07-30
Supplement: molecules-25-03462-s001.pdf [file molecules-25-03462-s001.pdf]

## Equilibria in Aqueous Cobalt(II) – Reduced Schiff Base *N*-(2-hydroxybenzyl)alanine System: Chemical Characterization, Kinetic Analysis, Antimicrobial and Cytotoxic Properties

Magdalena Woźniczka <sup>1,\*</sup>, Manas Sutradhar <sup>2</sup>, Armando J.L. Pombeiro <sup>2</sup>, Mirosława Świątek <sup>1</sup>, Marek Pająk <sup>1</sup>, Joanna Gądek-Sobczyńska <sup>1</sup>, Magdalena Chmiela <sup>3</sup>, Weronika Gonciarz <sup>3</sup>, Beata Pasternak <sup>4</sup> and Aleksander Kufelnicki <sup>1</sup>

- Page 3. **Figure S1.** Species distribution curves as a function of pH for AlaSal;  $C_{\text{AlaSal}} = 2.0 \times 10^{-2}$  M.
- Page 4. **Figure S2.** Tandem mass spectrum of  $[\text{LH}_3]^+$  –  $m/z = 196.0$ ,  $C_{\text{AlaSal}} = 1.0 \times 10^{-2}$  M.
- Page 5. **Figure S3.** ESI-MS spectra for ligand in positive ion-mode at various pH,  $C_{\text{AlaSal}} = 1.0 \times 10^{-2}$  M. Explanation of the adduct signal described in the text:  
 $m/z = 111.0$  [fragment ion  $m/z = 79 + \text{CH}_3\text{OH}]^+$   
 $m/z = 174.0$  [deprotonated fragment ion  $m/z = 152 + \text{Na}]^+$   
 $m/z = 211.0$  [fragment ion  $m/z = 152 + \text{NaOH} + \text{H}_2\text{O}]^+$ .
- Page 6. **Figure S4.** ESI-MS spectra for ligand in negative ion-mode at various pH,  $C_{\text{AlaSal}} = 1.0 \times 10^{-2}$  M.
- Page 7. **Figure S5.** Negative-ion ESI-MS spectra for the complexes formed in the  $\text{Co}(\text{NO}_3)_2/\text{AlaSal}$  system at ligand-to-metal molar ratio 2:1, at various pH,  $C_{\text{AlaSal}} = 2 \times 10^{-2}$  M. Explanation of the signal described in the text:  
 $m/z = 615.0$  [ $\text{CoL}_2\text{H} + \text{deprotonated fragment ion } m/z = 107 + \text{HNO}_3]^-$ .
- Page 8. **Figure S6.** Positive-ion ESI-MS spectra for the complexes formed in the  $\text{Co}(\text{NO}_3)_2/\text{AlaSal}$  system at ligand-to-metal molar ratio 2:1, at various pH,  $C_{\text{AlaSal}} = 2 \times 10^{-2}$  M. Explanation of the signal described in the text:  
 $m/z = 218.0$  [ $\text{Co}(\text{II}) + \text{fragment ion } m/z = 79 + 2\text{OH} + \text{NO}_2]^+$   
 $m/z = 576.0$  [ $\text{CoL}_2\text{H} + \text{fragment ion } m/z = 107 + \text{Na}]^+$   
 $m/z = 618.0$  [ $\text{CoL}_2\text{H} + \text{fragment ion } m/z = 108 + \text{H} + \text{HNO}_3]^+$   
 $m/z = 662.0$  [ $\text{CoL}_2\text{H} + \text{fragment ion } m/z = 152 + \text{H} + \text{HNO}_3]^+$ .

Page 9. **Figure S7. (a)** UV spectra of AlaSal during titration within the pH range 1.90–11.30,  $C_{\text{AlaSal}} = 2 \times 10^{-4}$  M; **(b)** Molar absorption coefficients ( $\epsilon$ ) of various ligand ionic forms.

Page 10. **Figure S8. (a)** UV/Vis spectra during titration of the Co(II) – AlaSal system at ligand-to-metal molar ratio 2:1, pH range 1.80–11.43;  $C_{\text{AlaSal}} = 2 \times 10^{-3}$  M. **(b)** Molar absorption coefficients ( $\epsilon$ ) of the two complexes accepted by HypSpec deconvolution.

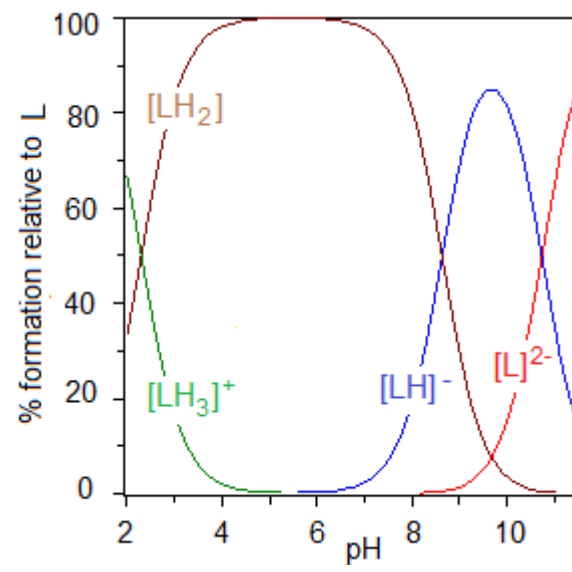

**Figure S1.** Species distribution curves as a function of pH for AlaSal;  $C_{\text{AlaSal}} = 2.0 \times 10^{-2}$  M.

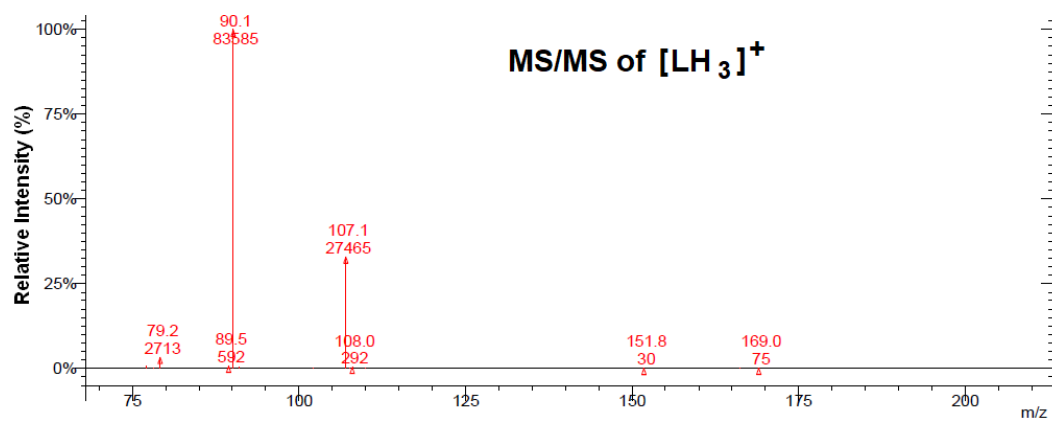

Figure S2. Tandem mass spectrum of  $[LH_3]^+$  –  $m/z = 196.0$ ,  $C_{AlaSal} = 1.0 \times 10^{-2}$  M.

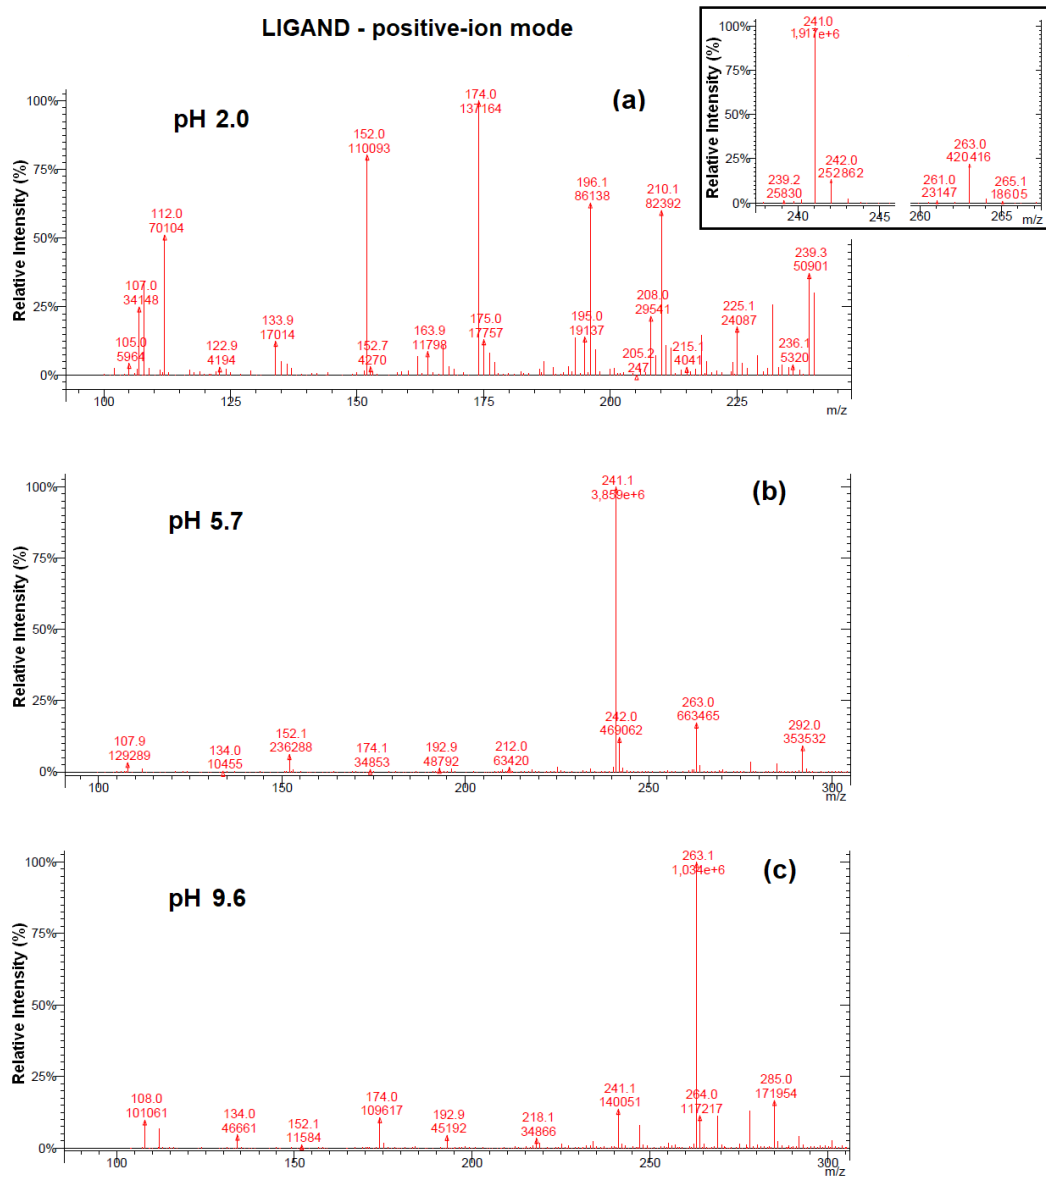

**Figure S3.** ESI-MS spectra for ligand in positive ion-mode at various pH,  $C_{AlaSal} = 1.0 \times 10^{-2}$  M.

Explanation of the adduct signal described in the text:

$m/z = 111.0$  [fragment ion  $m/z = 79 + CH_3OH$ ]<sup>+</sup>

$m/z = 174.0$  [deprotonated fragment ion  $m/z = 152 + Na$ ]<sup>+</sup>

$m/z = 211.0$  [fragment ion  $m/z = 152 + NaOH + H_2O$ ]<sup>+</sup>.

### LIGAND - negative-ion mode

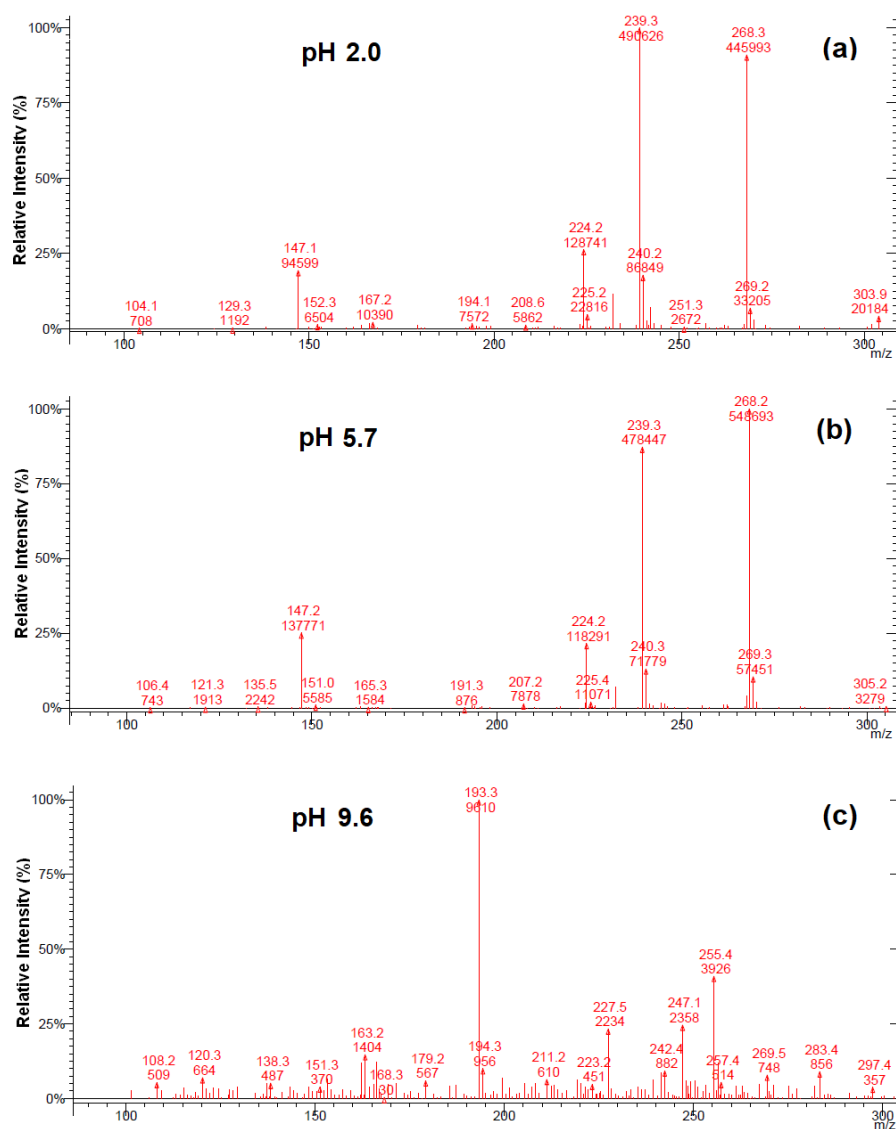

**Figure S4.** ESI-MS spectra for ligand in negative ion-mode at various pH,  $C_{AlaSal} = 1.0 \times 10^{-2}$  M.

ligand-to-metal molar ratio 2:1  
(negative-ion mode)

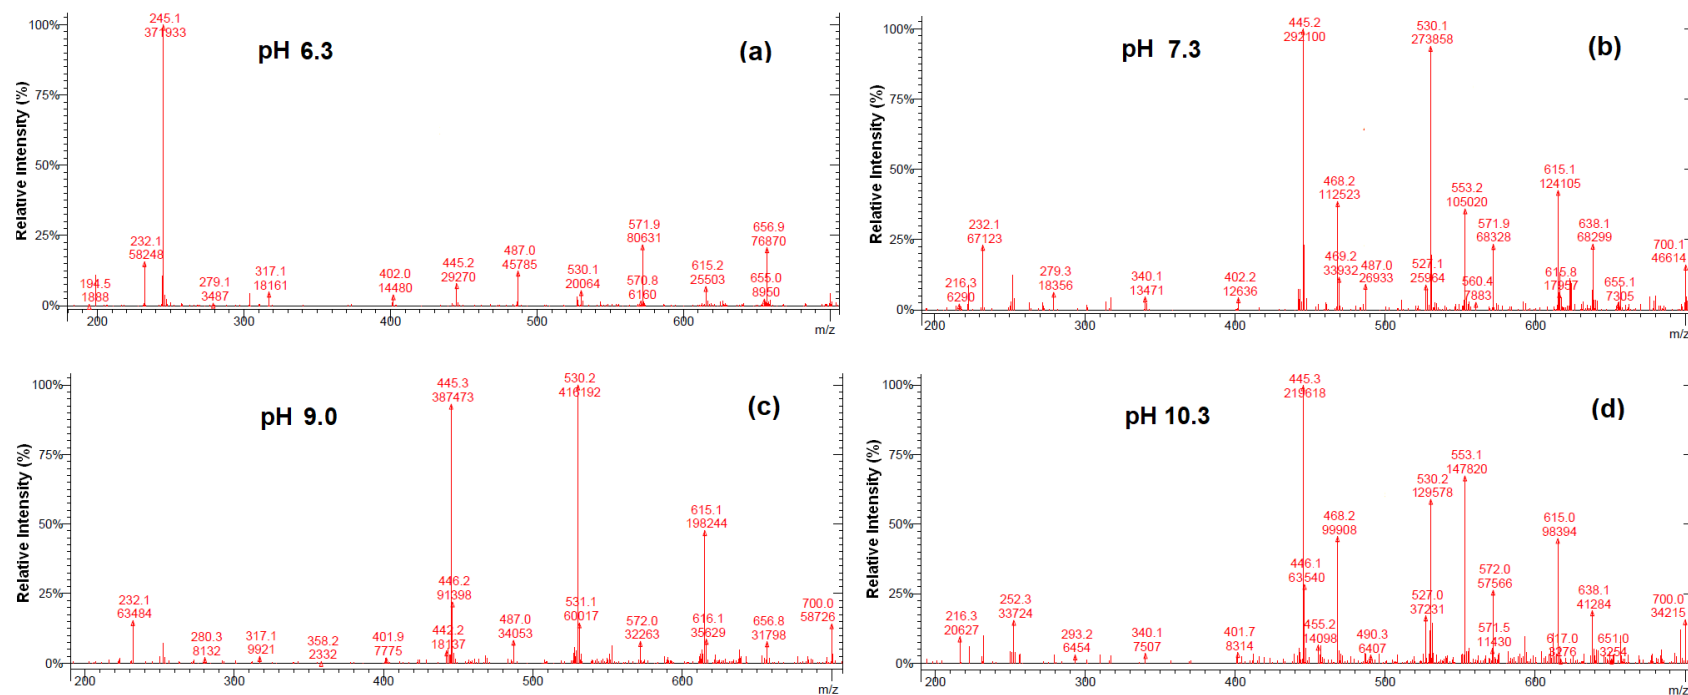

**Figure S5.** Negative-ion ESI-MS spectra for the complexes formed in the  $\text{Co}(\text{NO}_3)_2/\text{AlaSal}$  system at ligand-to-metal molar ratio 2:1, at various pH,  $C_{\text{AlaSal}} = 2 \times 10^{-2}$  M. Explanation of the signal described in the text:  $m/z = 615.0$  [ $\text{CoL}_2\text{H} + \text{deprotonated fragment ion } m/z = 107 + \text{HNO}_3$ ].

ligand-to-metal molar ratio 2:1  
(positive-ion mode)

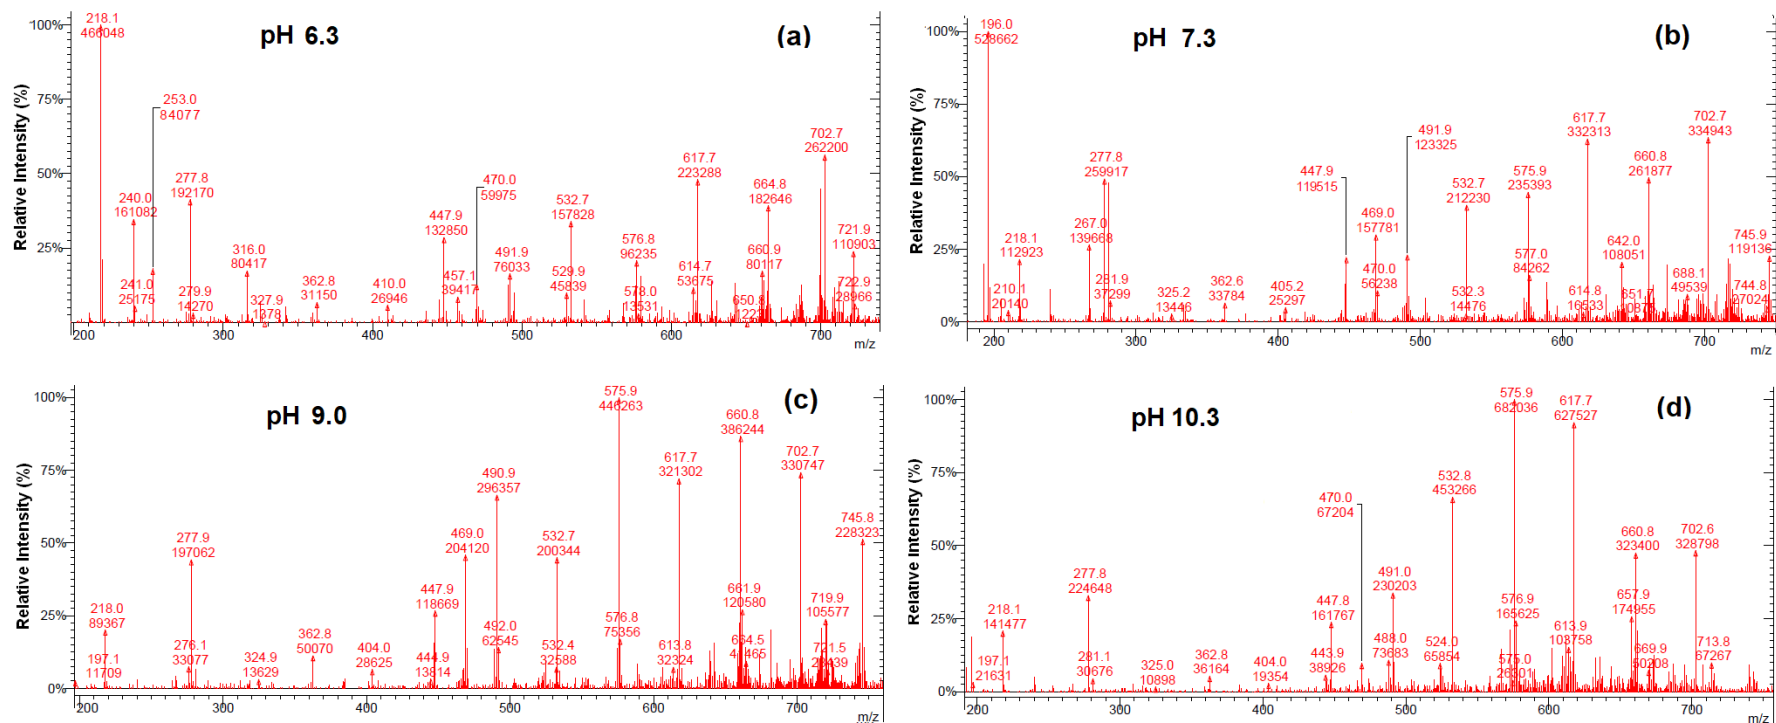

**Figure S6.** Positive-ion ESI-MS spectra for the complexes formed in the  $\text{Co}(\text{NO}_3)_2/\text{AlaSal}$  system at ligand-to-metal molar ratio 2:1, at various pH,  $C_{\text{AlaSal}} = 2 \times 10^{-2}$  M. Explanation of the signal described in the text:  
 $m/z = 218.0$  [ $\text{Co}(\text{II}) + \text{fragment ion } m/z = 79 + 2\text{OH} + \text{NO}_2$ ]<sup>+</sup>  
 $m/z = 576.0$  [ $\text{CoL}_2\text{H} + \text{fragment ion } m/z = 107 + \text{Na}$ ]<sup>+</sup>  
 $m/z = 618.0$  [ $\text{CoL}_2\text{H} + \text{fragment ion } m/z = 108 + \text{H} + \text{HNO}_3$ ]<sup>+</sup>  
 $m/z = 662.0$  [ $\text{CoL}_2\text{H} + \text{fragment ion } m/z = 152 + \text{H} + \text{HNO}_3$ ]<sup>+</sup>.



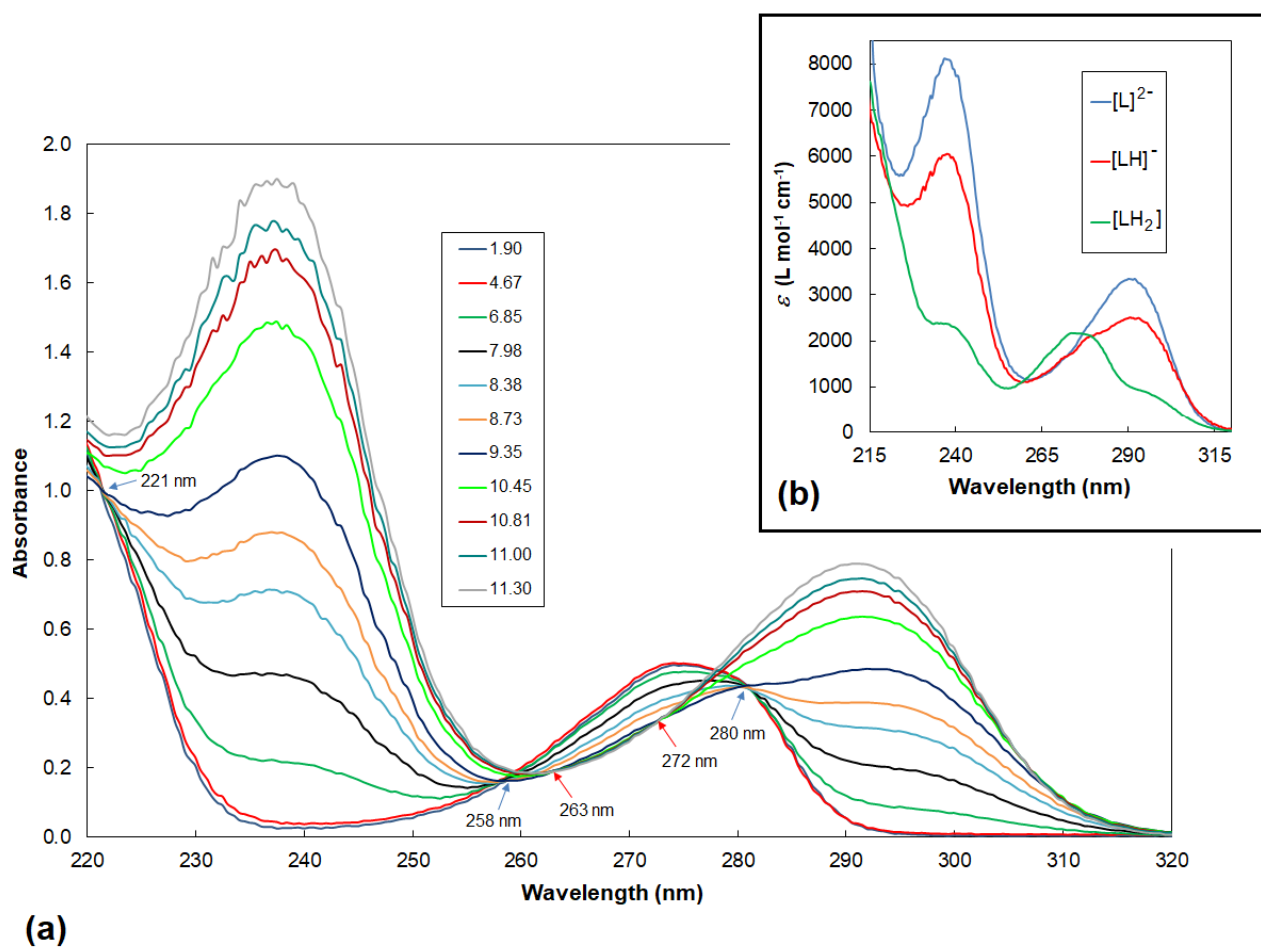

**Figure S7.** (a) UV spectra of AlaSal during titration within the pH range 1.90–11.30,  $C_{\text{AlaSal}} = 2 \times 10^{-4}$  M; (b) Molar absorption coefficients ( $\epsilon$ ) of various ligand ionic forms.

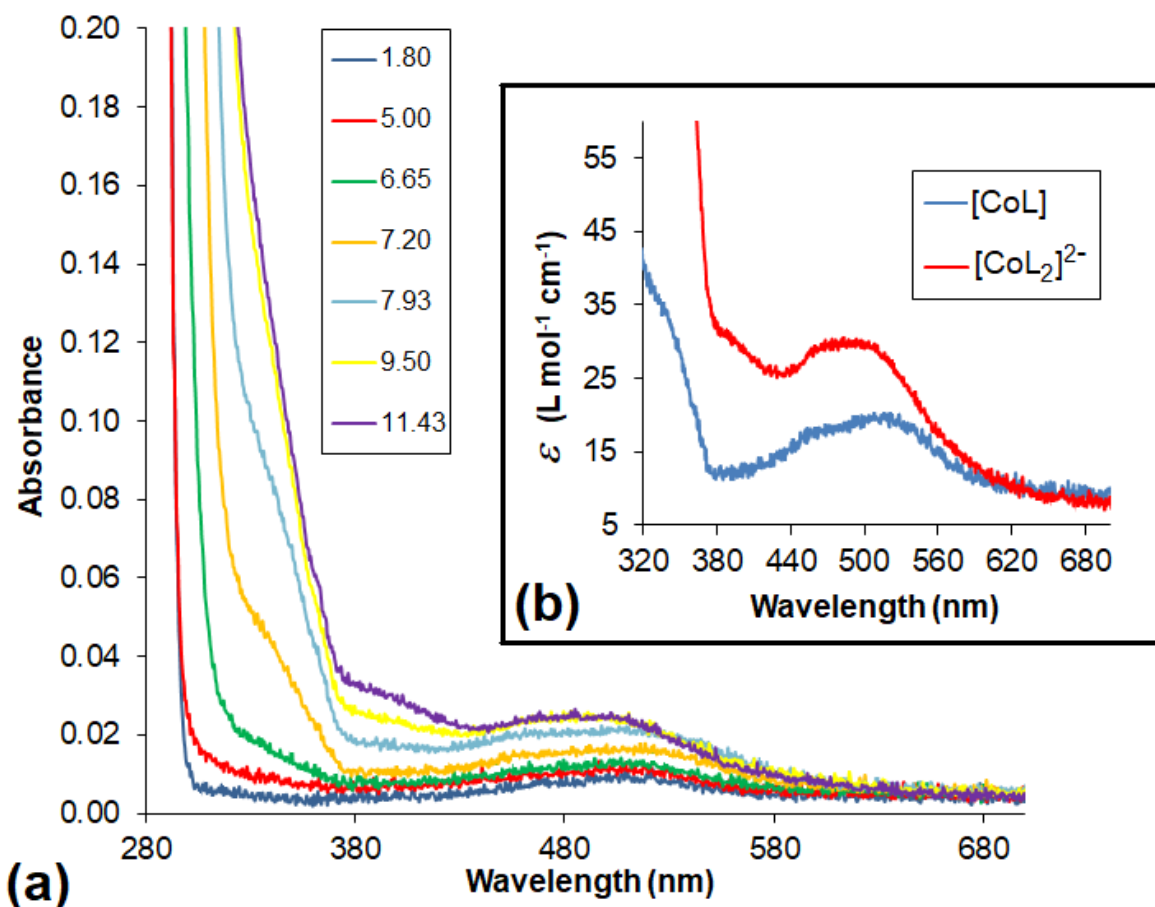

**Figure S8.** (a) UV/Vis spectra during titration of the Co(II) – AlaSal system at ligand-to-metal molar ratio 2:1, pH range 1.80–11.43;  $C_{\text{AlaSal}} = 2 \times 10^{-3}$  M. (b) Molar absorption coefficients ( $\epsilon$ ) of the two complexes accepted by HypSpec deconvolution.
